# Supplementary material
Source: PubMed Central journal article supplement (PMC5901390)

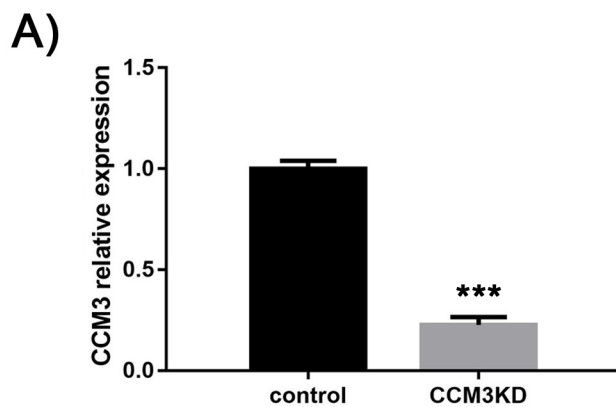

**B)**

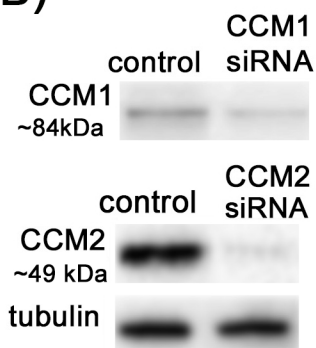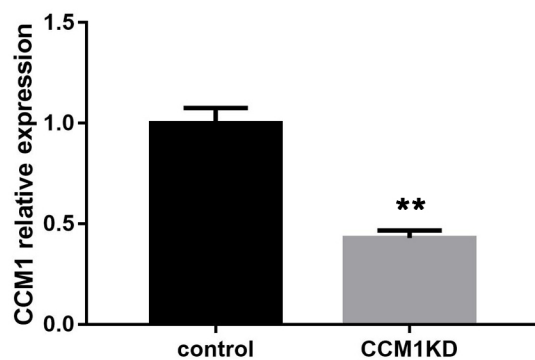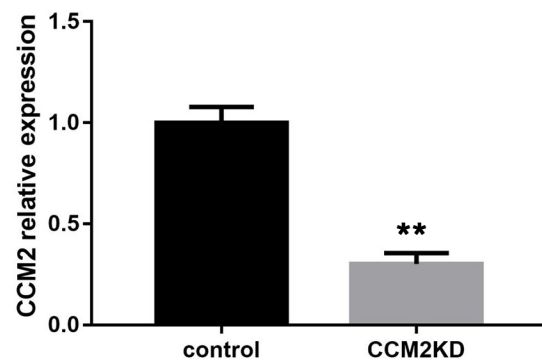

**C)**

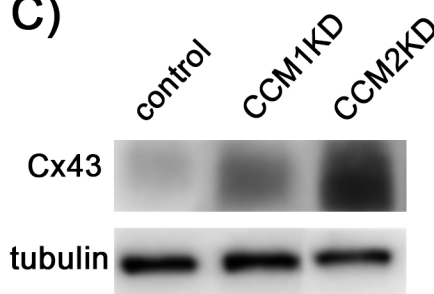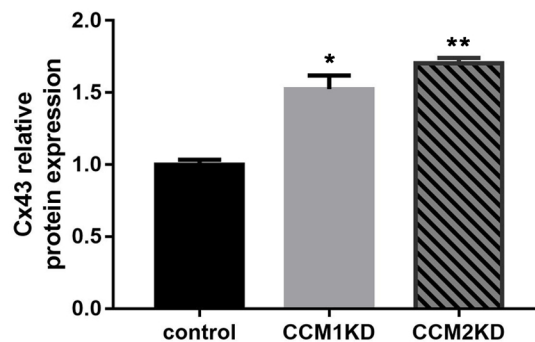

Supplement: fj.201700699R.sf1.pdf [file fj.201700699R.sf1.pdf]

A)

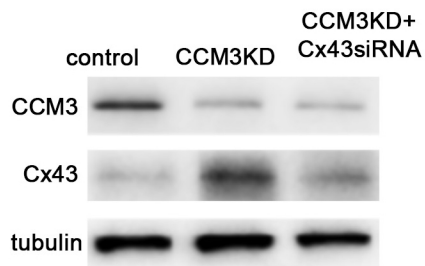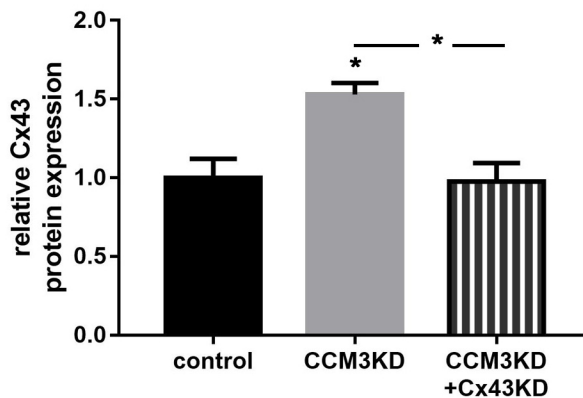

B)

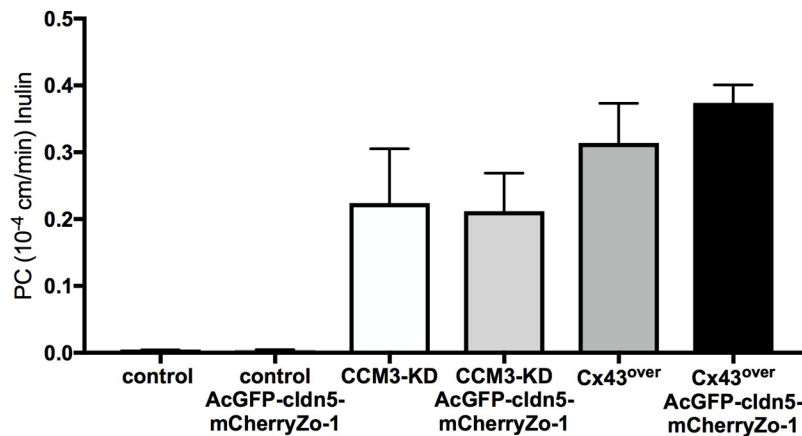

Supplemental Figure 2.

Supplement: fj.201700699R.sf2.pdf [file fj.201700699R.sf2.pdf]
